# Supplementary material for: Parainfluenza Virus 5 Infection in Neurological Disease and Encephalitis of Cattle
Source: MDPI journal article supplement (doi:10.3390/ijms21020498), 2020-01-13
Supplement: s1 [file s1]

**A**

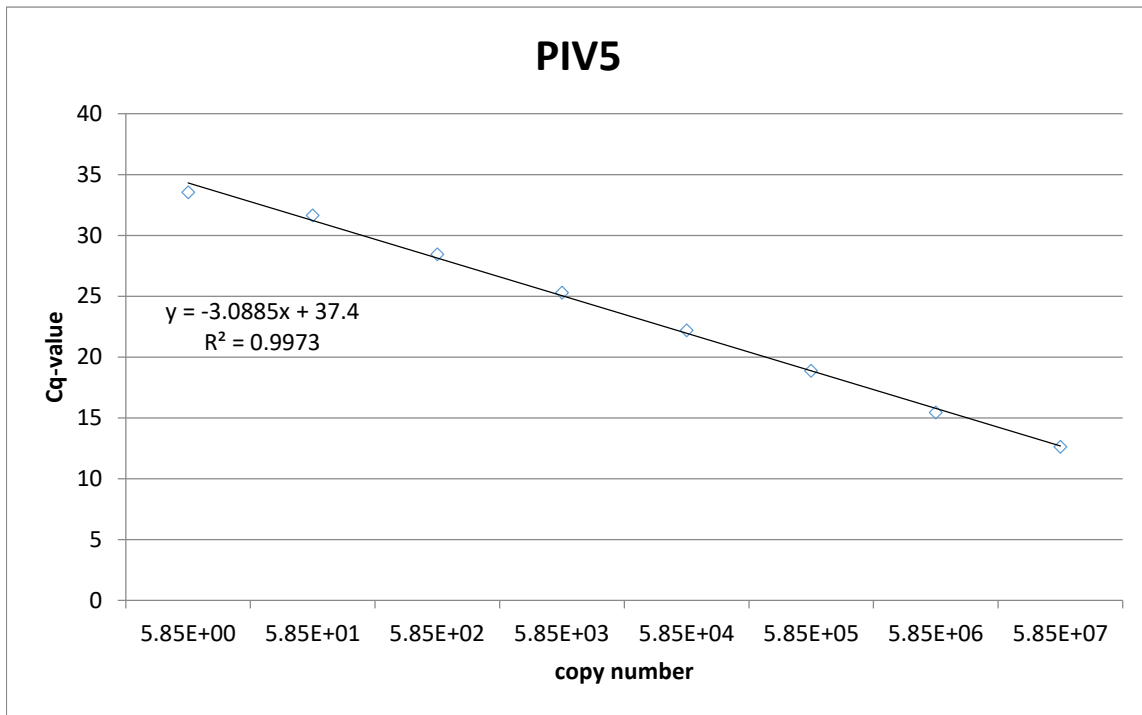

**B**

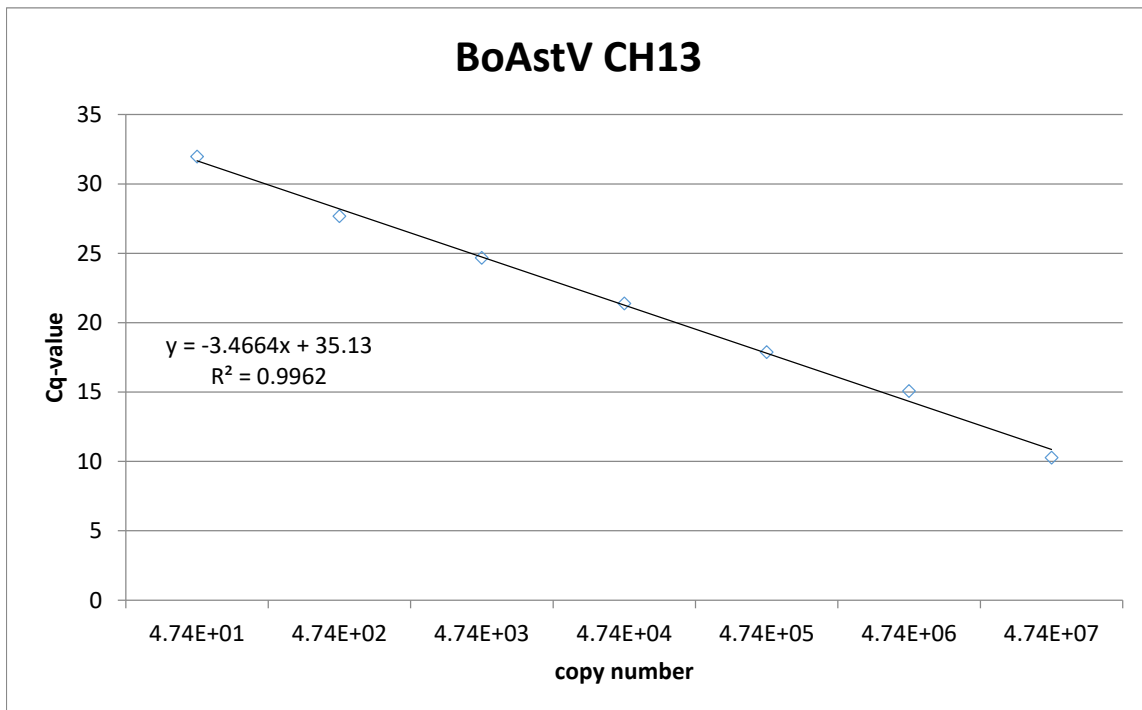

**C**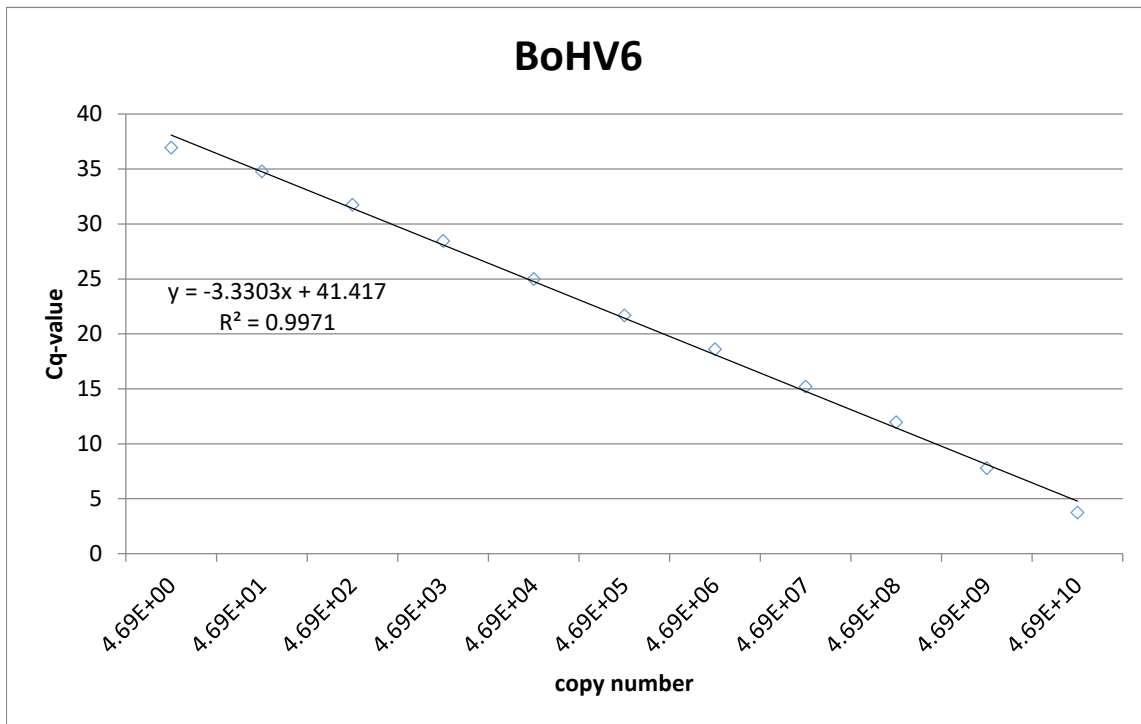

**Figure S2:** Standard curves of defined viral copy numbers in relation to Cq values. Cq values are plotted against 10-fold dilution series of defined copy numbers of PIV5 (A), BoAstV (B) and BoHV6 (C). For every standard curve a formula for copy number calculation from Cq values is given as well as the coefficient of determination.
